# Supplementary material
Source: PubMed Central journal article supplement (PMC7456340)
Supplement: ciz455_suppl_supplementary_fig_2.pdf [file ciz455_suppl_supplementary_fig_2.pdf]

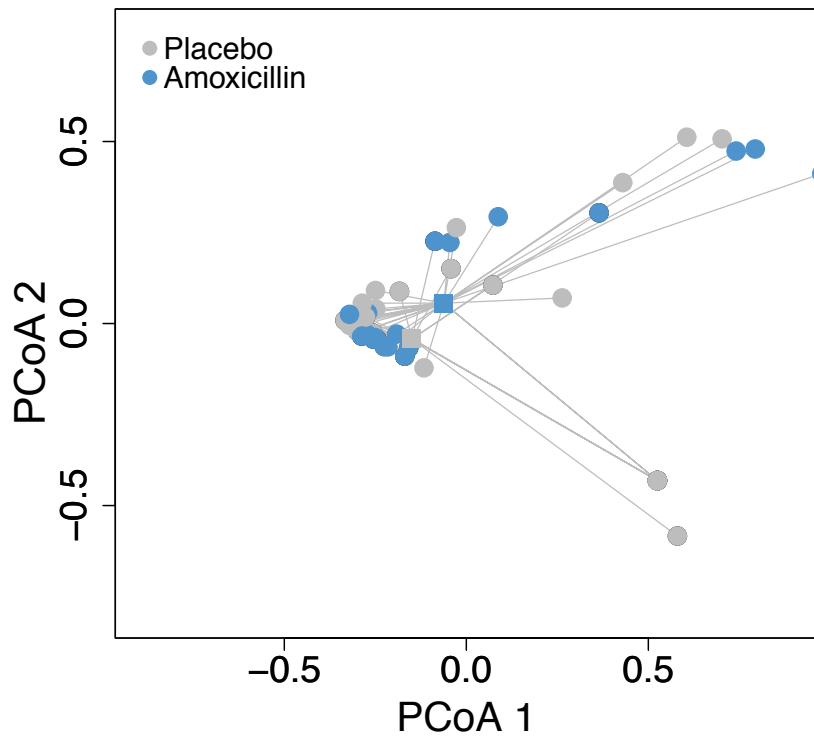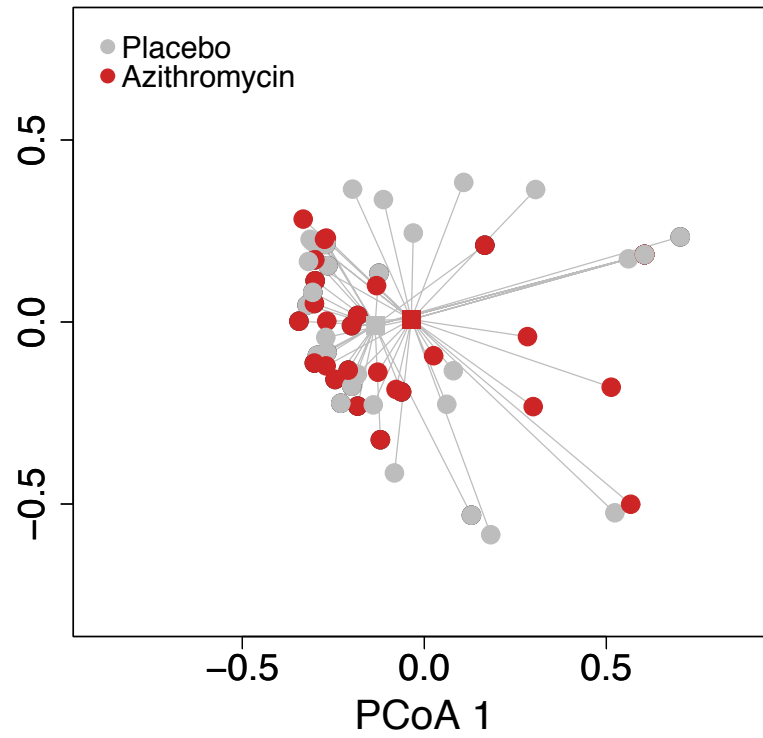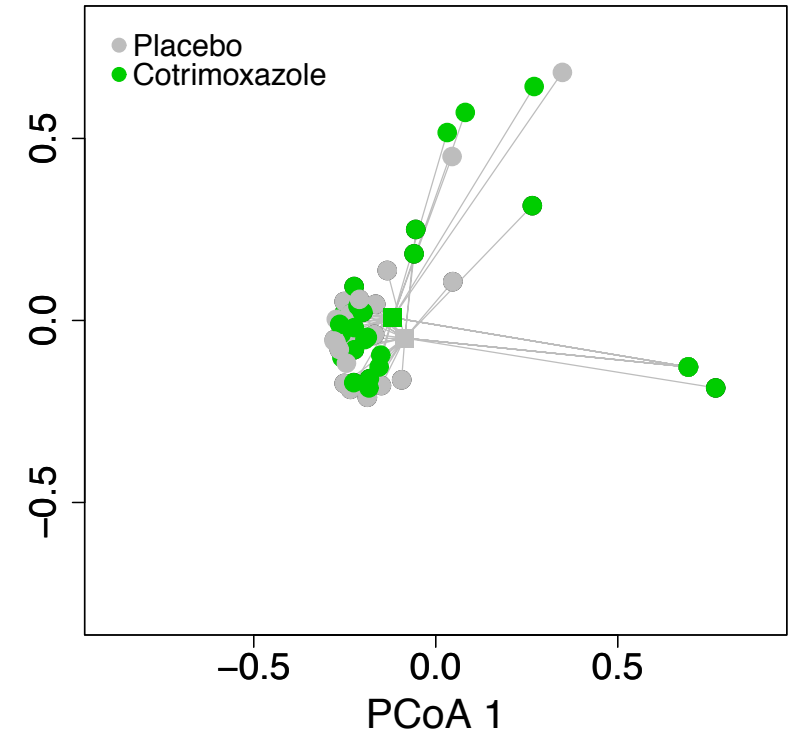

**Supplementary Figure 2.** Principal coordinates analysis plots for each antibiotic compared to placebo. Grey points indicate placebo, blue amoxicillin, red azithromycin, and green cotrimoxazole. Square points indicate the centroid.
