# Supplementary material
Source: PubMed Central journal article supplement (PMC7456340)

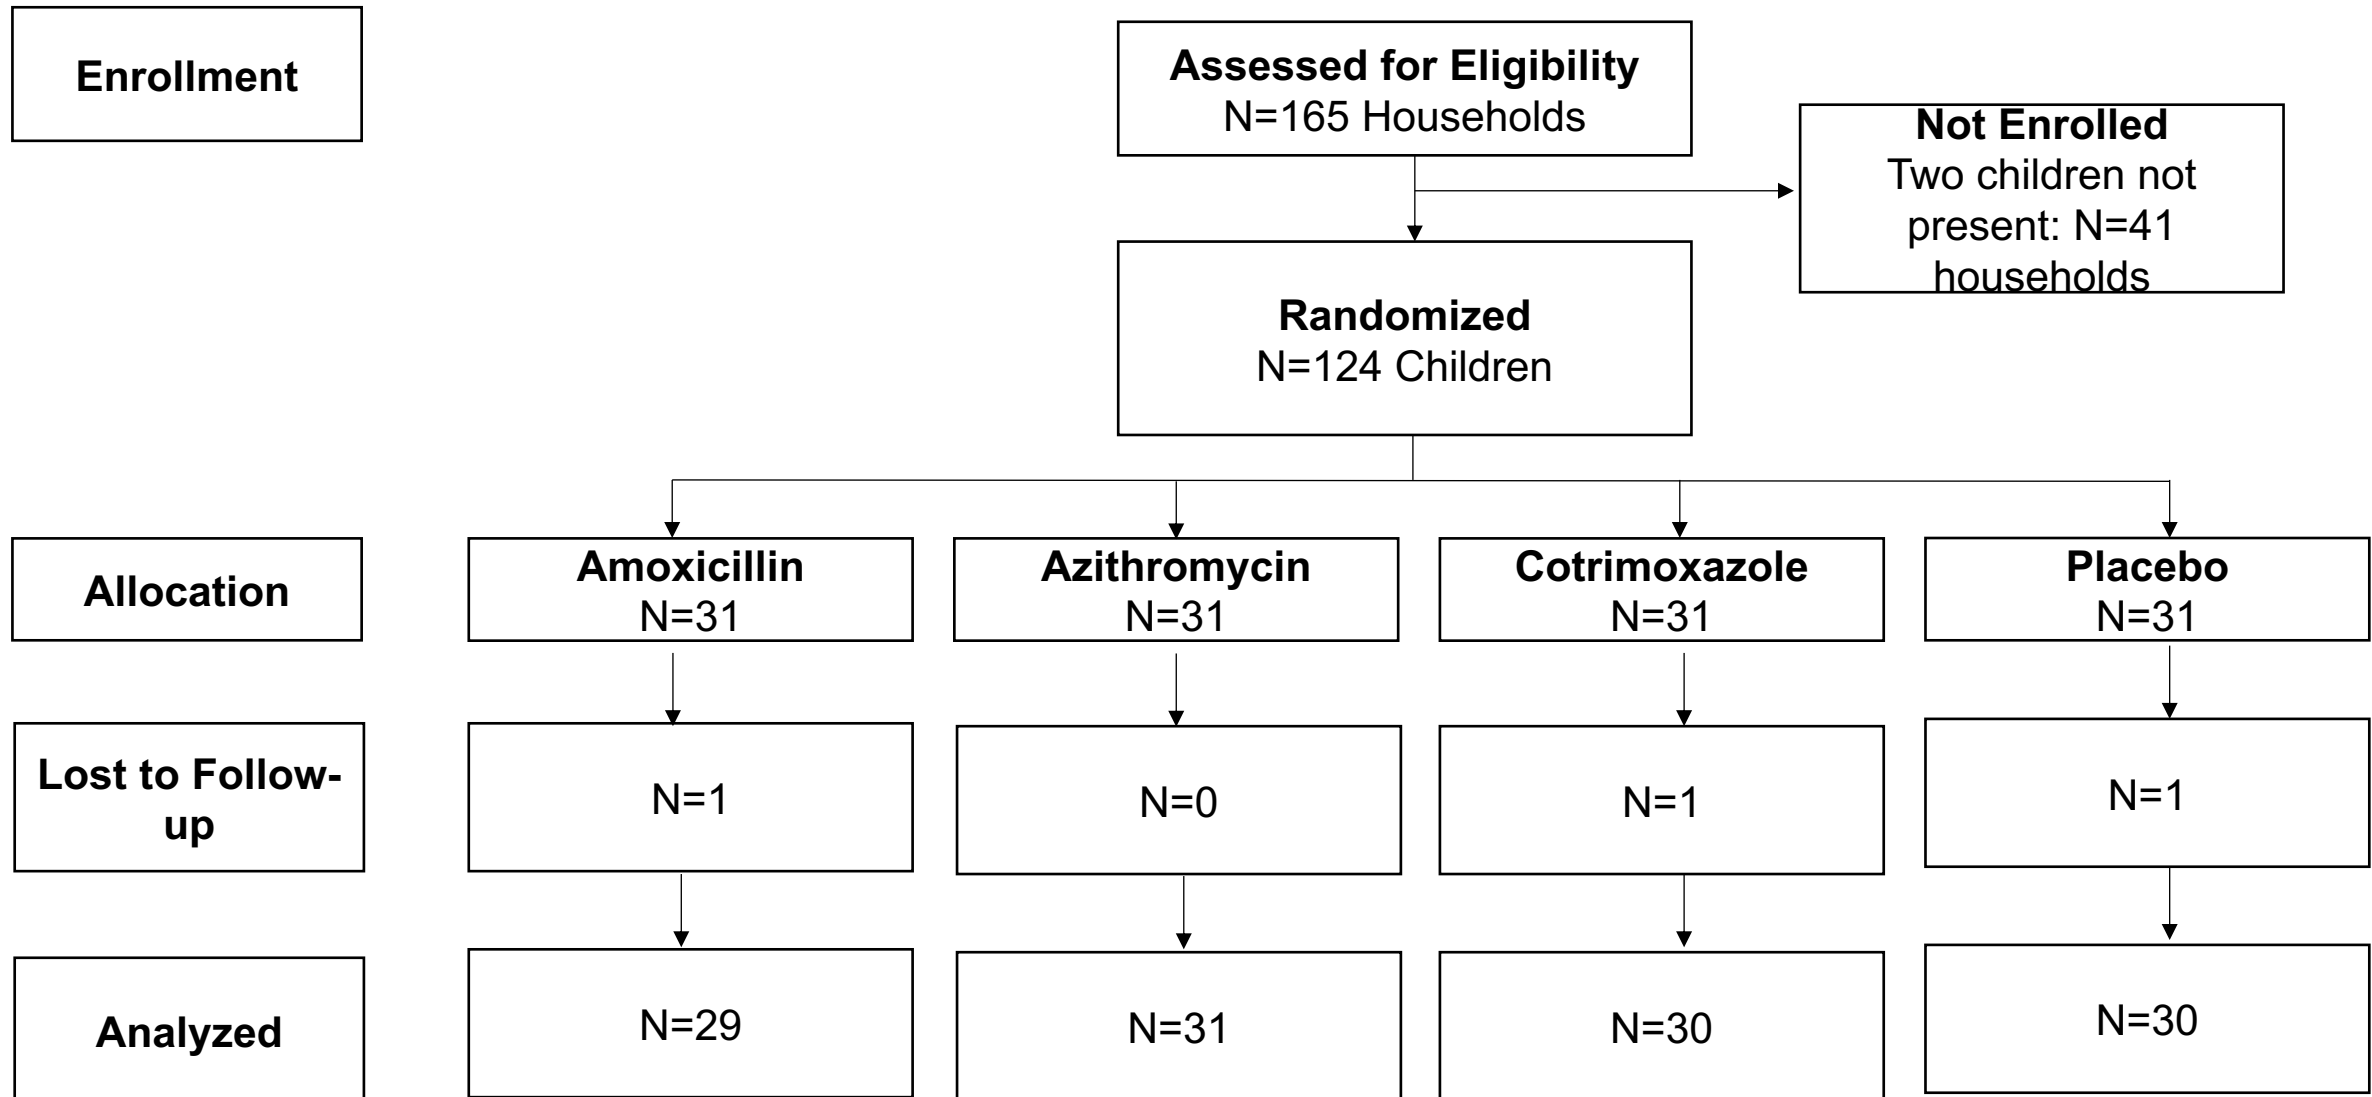

**Supplementary Figure 1.** CONSORT flow diagram for enrolled and analyzed children.

Supplement: ciz455_suppl_supplementary_fig_1.pdf [file ciz455_suppl_supplementary_fig_1.pdf]
